# Supplementary material for: Palladium/cobalt nanowires with improved hydrogen sensing stability at ultra-low temperatures
Source: Royal Society of Chemistry journal article supplement (doi:10.1039/c9nr07834g), 2019-01-01
Supplement: c9nr07834g1.pdf [file c9nr07834g1.pdf]

# Supporting Information

## Palladium / Cobalt Nanowires with Improved Hydrogen Sensing Stability at Ultra-Low Temperatures

Lingling Du,<sup>1</sup> Dongliang Feng,<sup>1</sup> Xiaxia Xing,<sup>1</sup> Yang Fu,<sup>1</sup> Luis F Fonseca<sup>2</sup> and Dachi Yang<sup>1</sup> \*

<sup>1</sup>Department of Electronics, College of Electronic Information and Optical Engineering, Nankai University, Tianjin 300350, China

\*E-mail: yangdachi@nankai.edu.cn

<sup>2</sup> Department of Physics, University of Puerto Rico Rio Piedras, San Juan, PR 00931, USA

### Contents

#### Experimental section

**Figure S1.** EDS analysis of PdCo NWs with various cobalt atomic ratios for (a) Pd<sub>82</sub>Co<sub>18</sub>, (b) Pd<sub>63</sub>Co<sub>37</sub> and (c) Pd<sub>33</sub>Co<sub>67</sub>, respectively.

**Table S1.** Crystallite sizes calculated from XRD data by Scherrer formula.

**Figure S2.** The response and recovery times toward 3% and 0.1% H<sub>2</sub> of (a) - (b) Pd<sub>82</sub>Co<sub>18</sub>, (c) - (d) Pd<sub>63</sub>Co<sub>37</sub> and (e) - (f) Pd<sub>33</sub>Co<sub>67</sub> at 273 K, respectively.

**Figure S3.** The sensing response to 0.1% - 3% H<sub>2</sub> of Pd<sub>82</sub>Co<sub>18</sub> NWs sensor at (a) 298 K, (b) 310 K, (c) 328 K, (d) 358 K, (e) 388 K, respectively. (f) The repeatability of the sensor at room temperature.

**Figure S4.** The sensing response to 0.1% - 3% H<sub>2</sub> of Pd<sub>63</sub>Co<sub>37</sub> NWs sensor at (a) 298 K, (b) 310 K, (c) 328 K, (d) 358 K, (e) 388 K, respectively. (f) The repeatability of the sensor at room temperature.

**Figure S5.** The sensing response to 0.1% - 3% H<sub>2</sub> of Pd<sub>33</sub>Co<sub>67</sub> NWs sensor at (a) 298 K, (b) 310 K, (c) 328 K, (d) 358 K, (e) 388 K, respectively. (f) The repeatability of the sensor at room temperature.

**Figure S6.** The hydrogen-sensing response of Pd<sub>82</sub>Co<sub>18</sub> NWs sensor at (a) 243 K, (b) 210 K, (c) 180 K, respectively.

**Figure S7.** The hydrogen-sensing response of Pd<sub>63</sub>Co<sub>37</sub> NWs sensor at (a) 243 K, (b) 210 K, (c) 180 K, (d) 150 K, respectively.

**Figure S8.** The hydrogen-sensing response of Pd<sub>33</sub>Co<sub>67</sub> NWs sensor at (a) 243 K, (b) 180 K, respectively.

**Figure S9.** The selective response of Pd<sub>63</sub>Co<sub>37</sub> NWs sensors toward 2% H<sub>2</sub> and interfering gases, including 2% NH<sub>3</sub>, CO, H<sub>2</sub>S and 0.5% NO at room temperature.

**Figure S10.** The hydrogen-sensing performance of pure Co NWs sensor at (a) 273 K, (b) 298 K, (c) 358 K, respectively.

**Figure S11.** The transient response curves of the Pd<sub>82</sub>Co<sub>18</sub> NWs sensor towards various H<sub>2</sub> concentrations under various temperatures.

**Figure S12.** The transient response curves of the Pd<sub>63</sub>Co<sub>37</sub> NWs sensor towards various H<sub>2</sub> concentrations under various temperatures.

**Figure S13.** The transient response curves of the Pd<sub>33</sub>Co<sub>67</sub> NWs sensor towards various H<sub>2</sub> concentrations under various temperatures.

## **Experimental section**

### **Preparation of PdCo NWs**

The optimized PdCo NWs were prepared through the AAO-confined electrodeposition method similar to previous publications.<sup>1-3</sup> Specifically, the samples with various chemical content of palladium/cobalt were prepared by regulating the molar ratio of PdCl<sub>2</sub> (Palladium chloride, AR, Pd content > 59.5 wt%, CAS: 7647-10-1, Mascot) and CoSO<sub>4</sub>·7H<sub>2</sub>O (Cobalt sulfate, AR, ≥ 99%, CAS:10026-24-1, Aladdin) in electrolytic solution. In addition, the electrolytes also contained 0.2 g/L C<sub>12</sub>H<sub>25</sub>SO<sub>4</sub>Na (AR, ≥ 99.5%, CAS: 151-21-3, Huawei Ruike) and 0.08 M H<sub>3</sub>BO<sub>3</sub> (GR, ≥ 99.5%, CAS: 10043-35-3, Xiya Reagent), followed by being buffered to pH ≈ 8 with NH<sub>3</sub>·H<sub>2</sub>O (ACS, 28.0-30.0% NH<sub>3</sub> basis, CAS: 1336-21-6, Aladdin).

The preparation of AAO template utilizes similar procedures to previous publications.<sup>4</sup> Before electrodeposition, one side of the AAO templates was covered with a sputtered thick Au layer to guarantee the covering of the AAO pores.<sup>4</sup> Then, the electrodeposition was conducted with two-electrode systems using a graphite plate as the counter electrode, and the gold/AAO templates as the working electrode. The PdCo NWs grow along with the nanochannels in the AAO templates under a constant voltage of 1.8-2.3 V and at room temperature. 4 M NaOH (ACS, ≥ 97%, CAS: 1310-73-2, Aladdin) served as the etching solution to remove the AAO templates at 60 °C for 150 min. The PdCo NWs were rinsed thoroughly in deionized water and dried at 50 °C.

### **Characterization**

Field-emission scanning electron microscopy (FE-SEM, JEOL-6701F) was performed

to obtain the images of the samples. Transmission electron microscopy (TEM, JEOL-2010) with high resolution TEM (HRTEM, JEOL-2010) was conducted for the high-resolution image. The elemental mappings were obtained with energy dispersive X-ray spectroscopy (EDX) and the atomic ratio was used as the reference to the samples. X-ray diffraction (XRD) with Cu K $\alpha$  ( $\lambda = 1.5406 \text{ \AA}$ ), and X-ray photoelectron spectroscopy (XPS, Thermo Scientific ESCALAB 250Xi) were carried out to characterize the crystallographic information and the chemical composition of the samples, respectively.

### **Building art of sensor prototypes and sensing evaluations**

For the hydrogen sensing evaluation, the sensors prototypes were firstly built by integrating PdCo NWs in alcohol to the interdigital electrodes (IEDs), and dried at 50°C in vacuum. Then, the prepared PdCo NWs sensor was mounted in a sealed chamber with gas inlets and outlets. Hydrogen sensing tests were performed with a test system similar to the one used in previous study.<sup>3</sup> Liquid nitrogen was used to cool the chamber to create the low-temperature test background. A temperature controller driven by external power sources was set below the sensing platform to maintain a constant temperature within the operating temperatures range of 150 K - 388 K. During testing, the various H<sub>2</sub> (99.99%, Air Liquide (Tianjin) co. LTD) concentrations (0.1% - 3%) balanced with high-purity Ar gas (99.99%, Air Liquide (Tianjin) co. LTD) were passed through the sample chamber, controlled by mass flow controllers (MFCs). A data collector (KEITHLEY, 2450 model) was used to set the applied voltage and show electric signals.

The hydrogen response of these sensors was normalized and defined as the ratio ( $\Delta R/R_0$  (%)) of the electrical resistance variation ( $\Delta R$ ) and the baseline resistance ( $R_0$ ). The resistance variation  $\Delta R = R_g - R_0$ , where  $R_0$  and  $R_g$  are the real-time peak resistance value in background Ar gas and  $H_2$  at different concentrations, respectively. The response / recovery time is defined as the time taken by the sensor to reach 90% of maximum resistance variation after turning on / off the hydrogen flux.

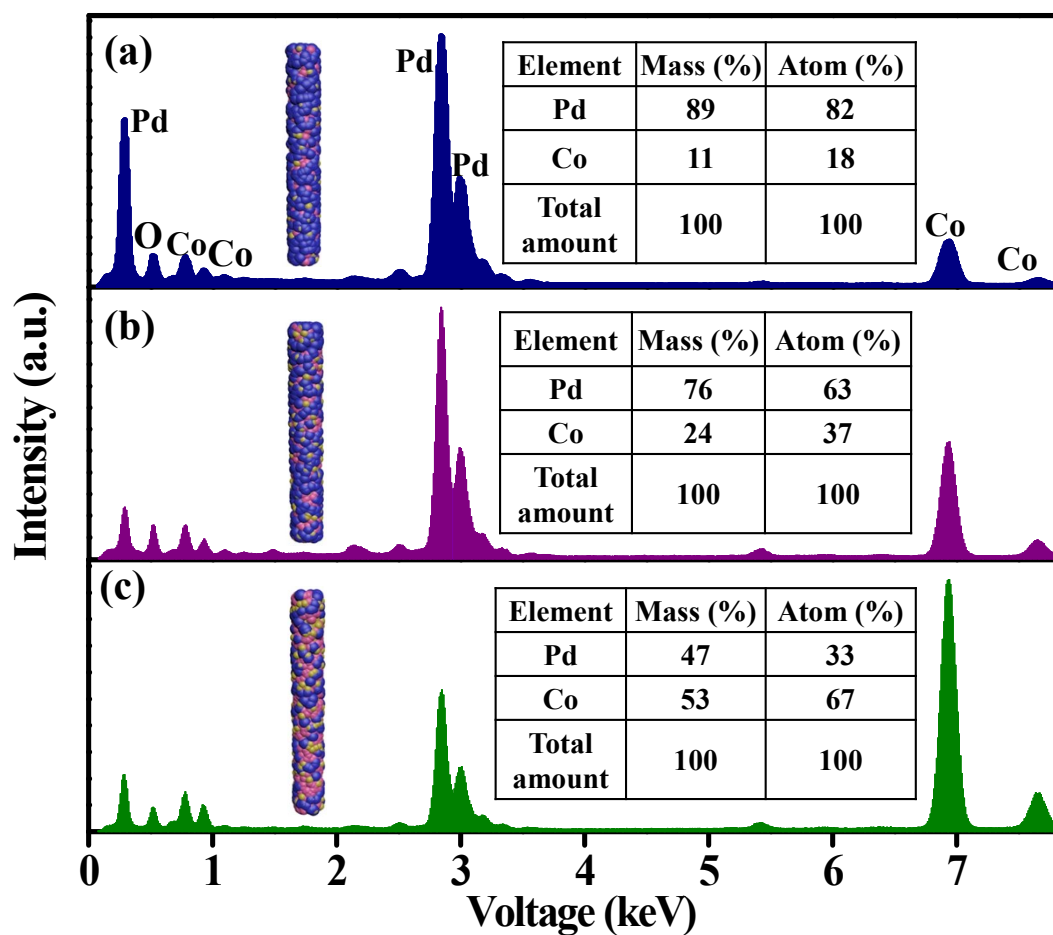

**Figure S1.** EDS analysis of PdCo NWs with various cobalt atomic ratios for (a) Pd<sub>82</sub>Co<sub>18</sub>, (b) Pd<sub>63</sub>Co<sub>37</sub> and (c) Pd<sub>33</sub>Co<sub>67</sub>, respectively.

**Table S1.** Crystallite sizes calculated from XRD data by Scherrer formula.

| <b>Samples</b>                    | <b>Crystallite size (nm)</b> |
|-----------------------------------|------------------------------|
| Pd <sub>82</sub> Co <sub>18</sub> | 6.24                         |
| Pd <sub>63</sub> Co <sub>37</sub> | 6.38                         |
| Pd <sub>33</sub> Co <sub>67</sub> | 7.01                         |

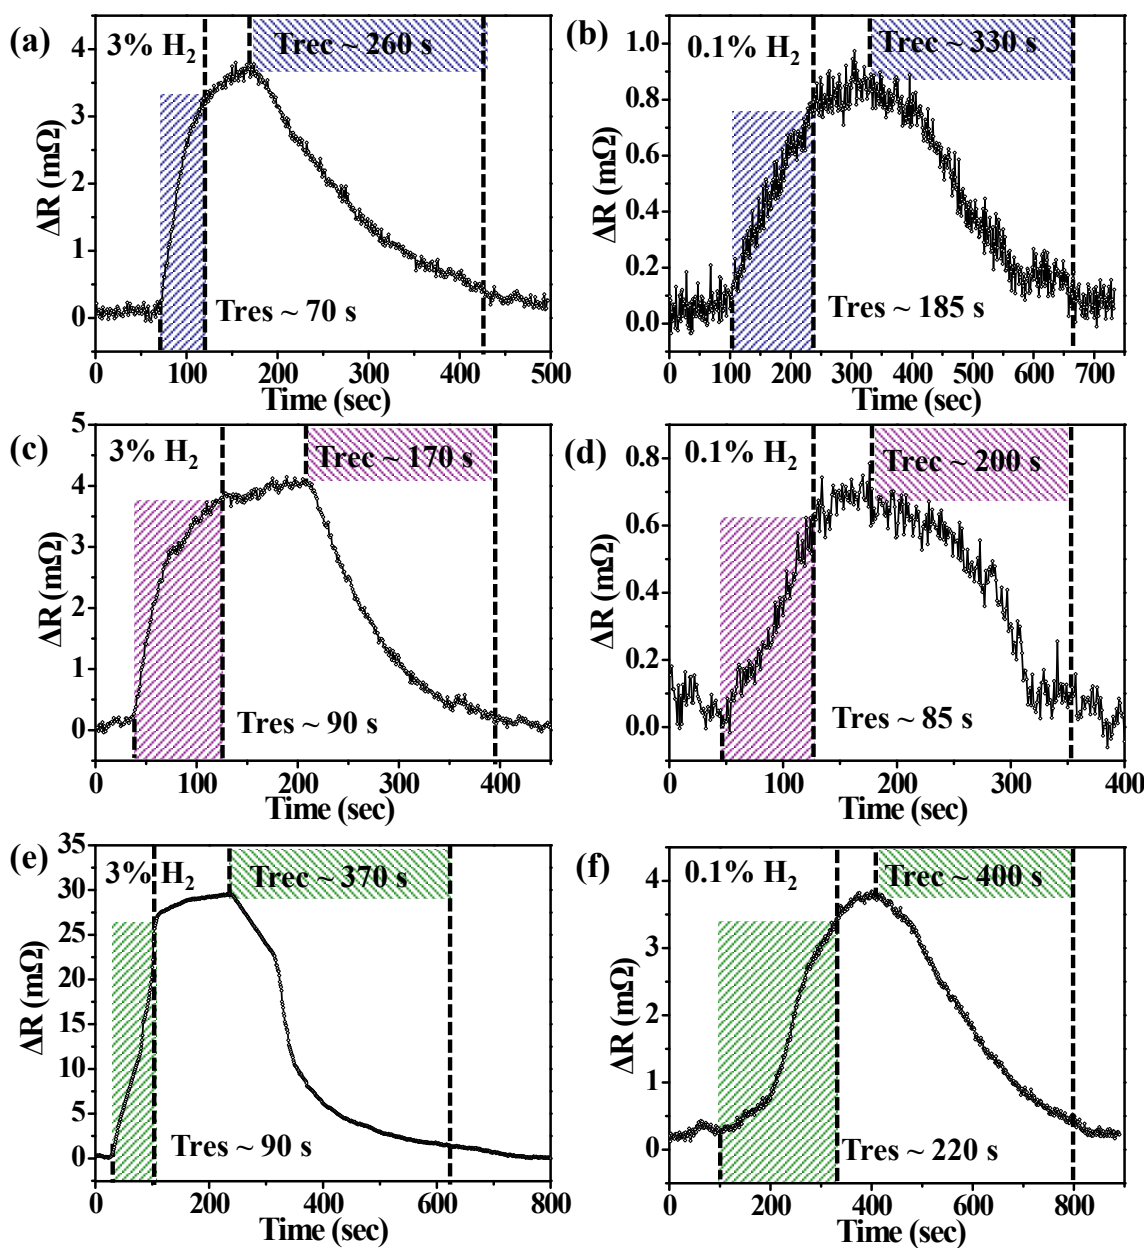

**Figure S2.** The response and recovery times toward 3% and 0.1%  $H_2$  of (a) - (b)  $Pd_{82}Co_{18}$ , (c) - (d)  $Pd_{63}Co_{37}$  and (e) - (f)  $Pd_{33}Co_{67}$  at 273 K, respectively.



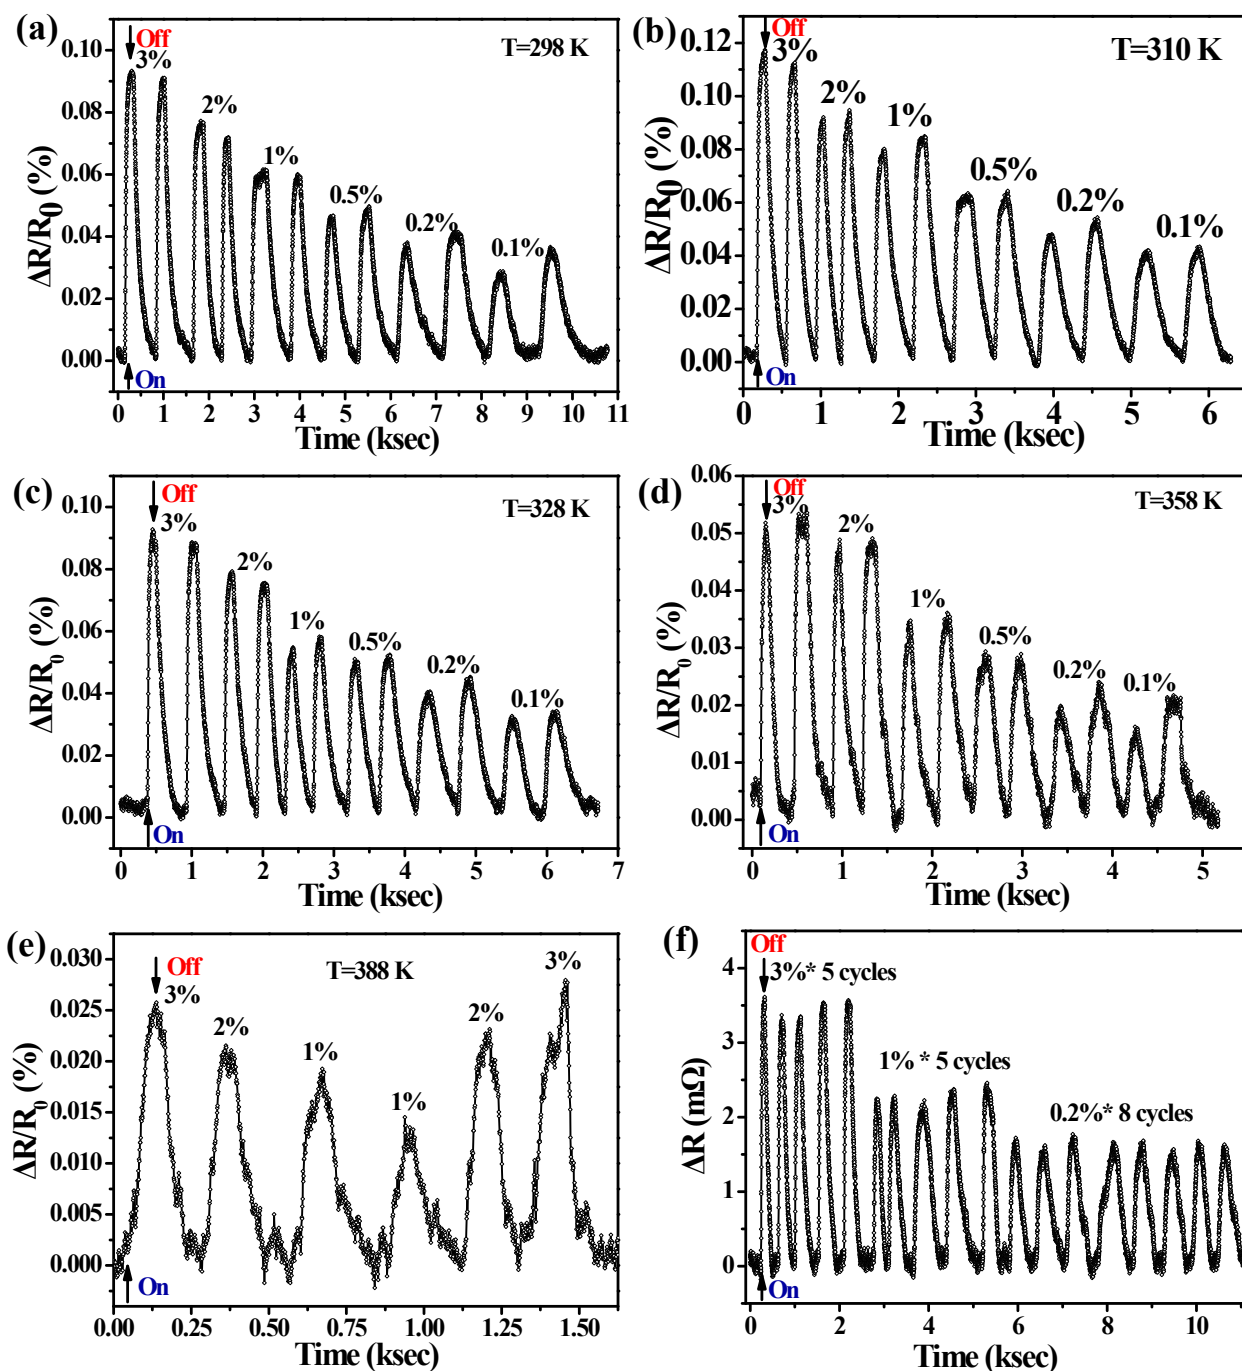

**Figure S3.** The sensing response to 0.1% - 3%  $\text{H}_2$  of  $\text{Pd}_{82}\text{Co}_{18}$  NWs sensor at (a) 298 K, (b) 310 K, (c) 328 K, (d) 358 K and (e) 388 K, respectively. (f) The repeatability of the sensor at room temperature.

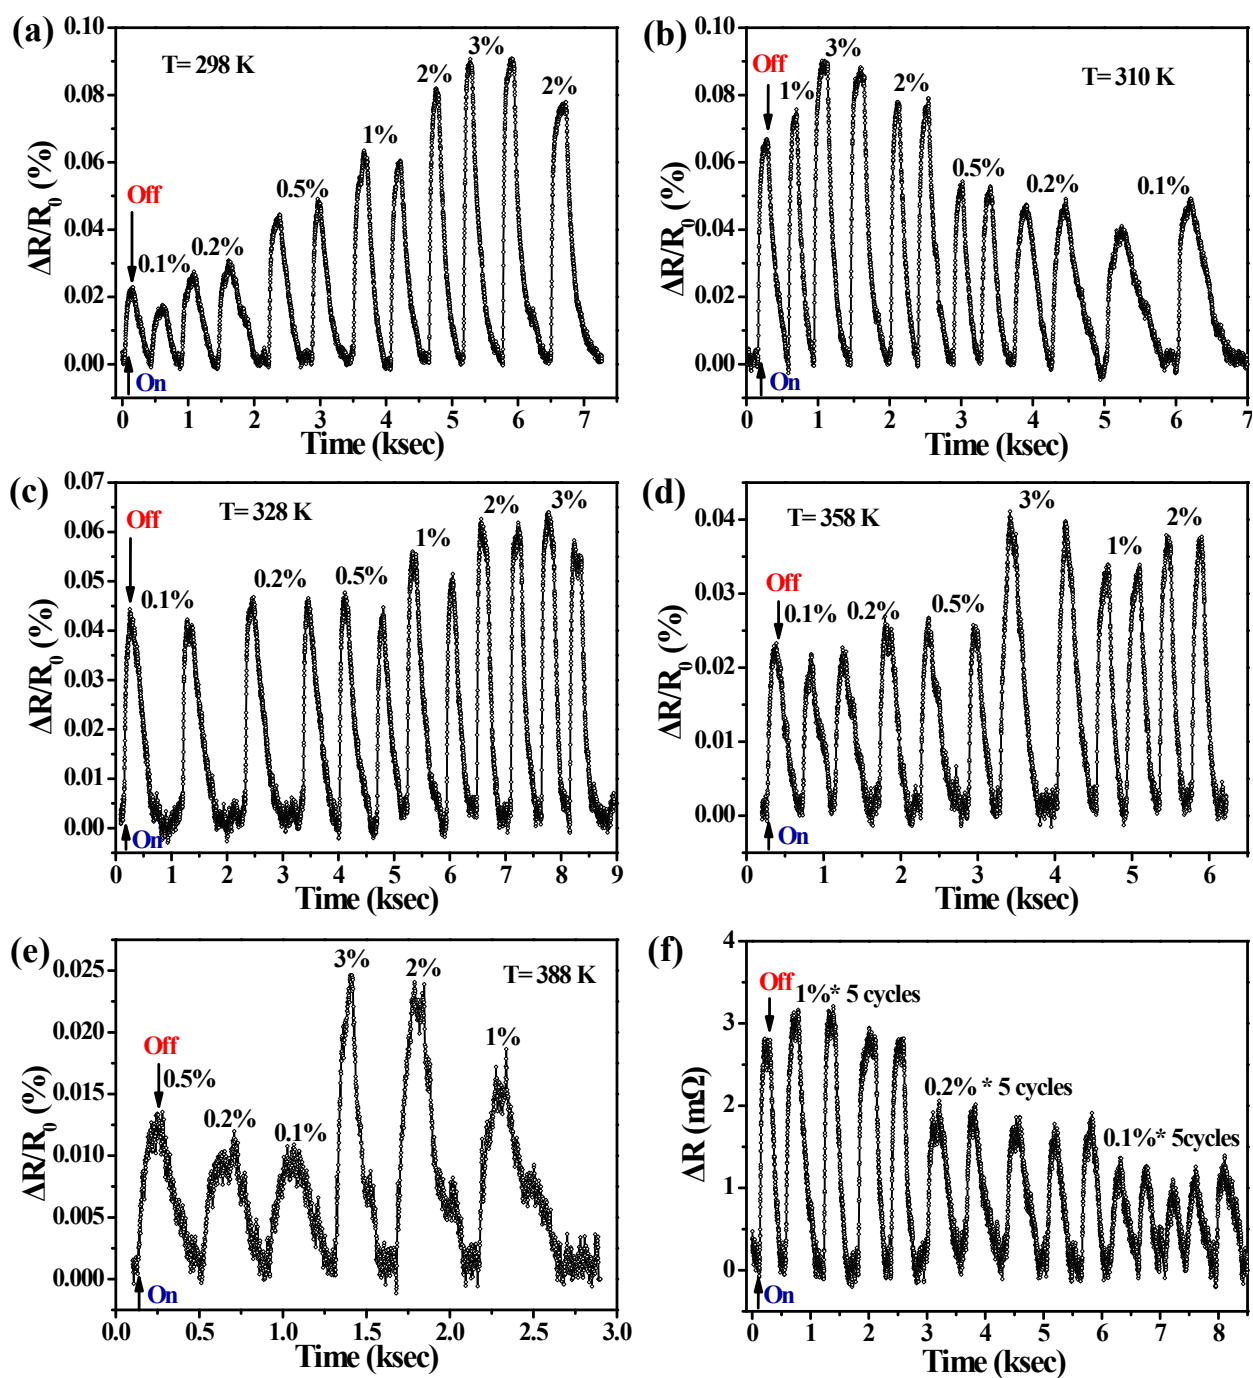

**Figure S4.** The sensing response to 0.1% - 3%  $\text{H}_2$  of  $\text{Pd}_{63}\text{Co}_{37}$  NWs sensor at (a) 298 K, (b) 310 K, (c) 328 K, (d) 358 K and (e) 388 K, respectively. (f) The repeatability of the sensor at room temperature.

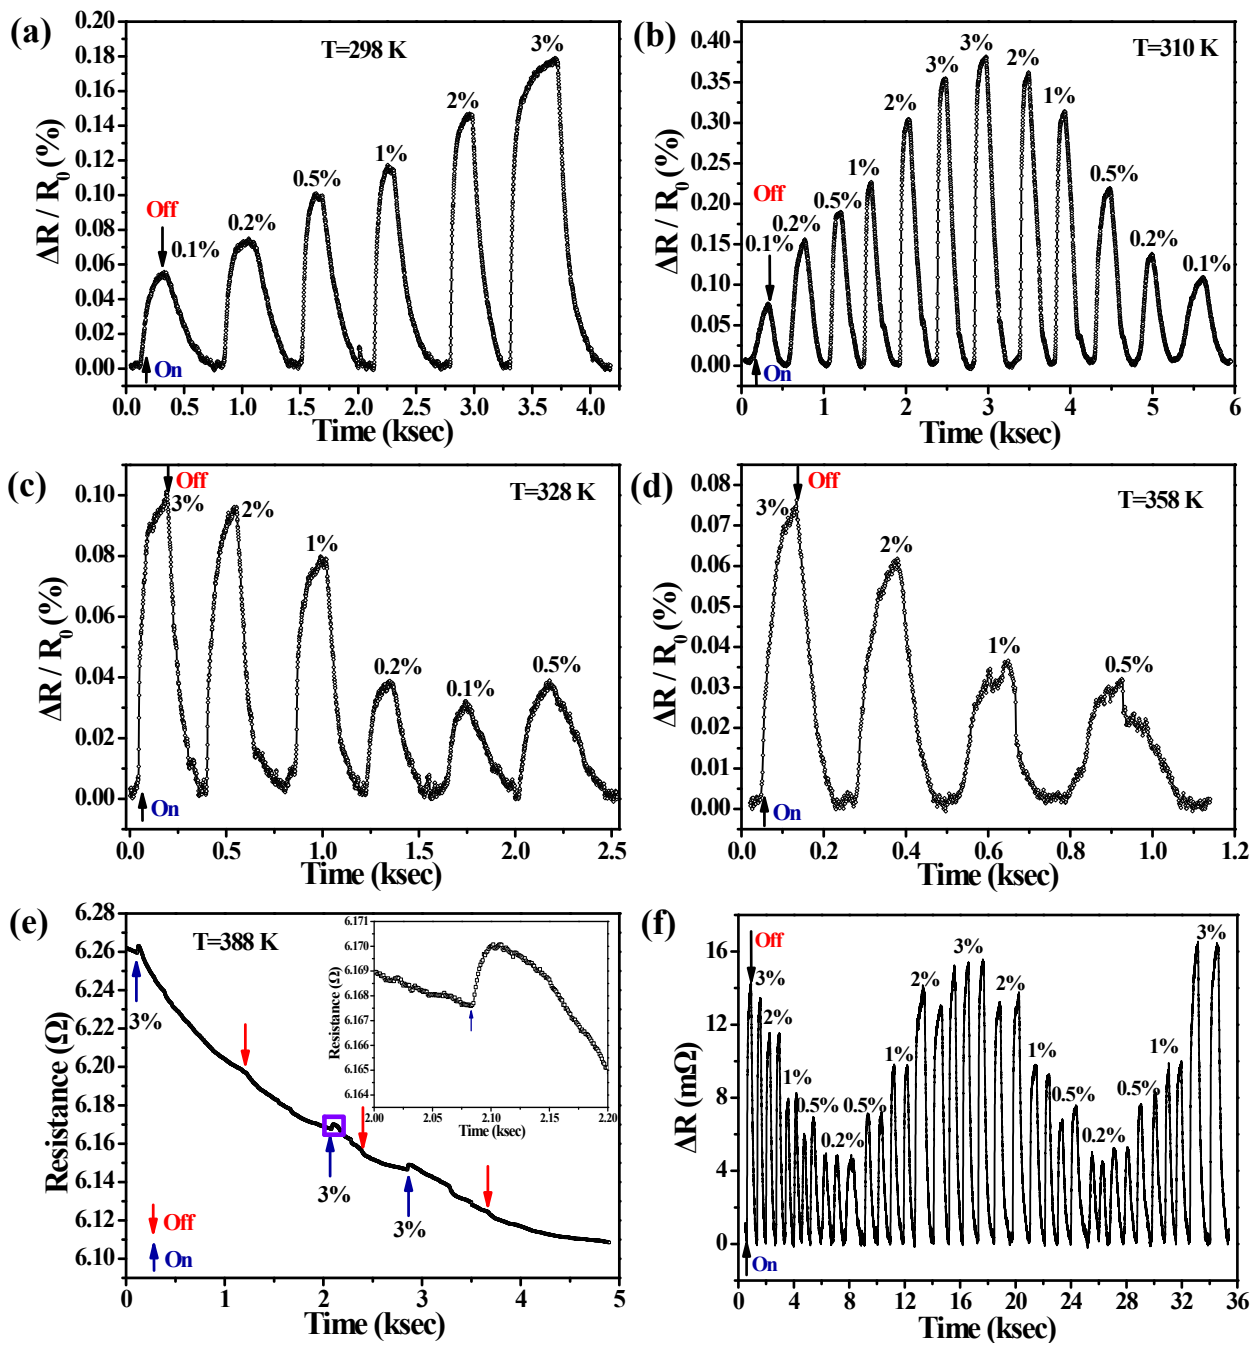

**Figure S5.** The sensing response to 0.1% - 3%  $\text{H}_2$  of  $\text{Pd}_{33}\text{Co}_{67}$  NWs sensor at (a) 298 K, (b) 310 K, (c) 328 K, (d) 358 K and (e) 388 K, respectively. (f) The repeatability of the sensor at room temperature.

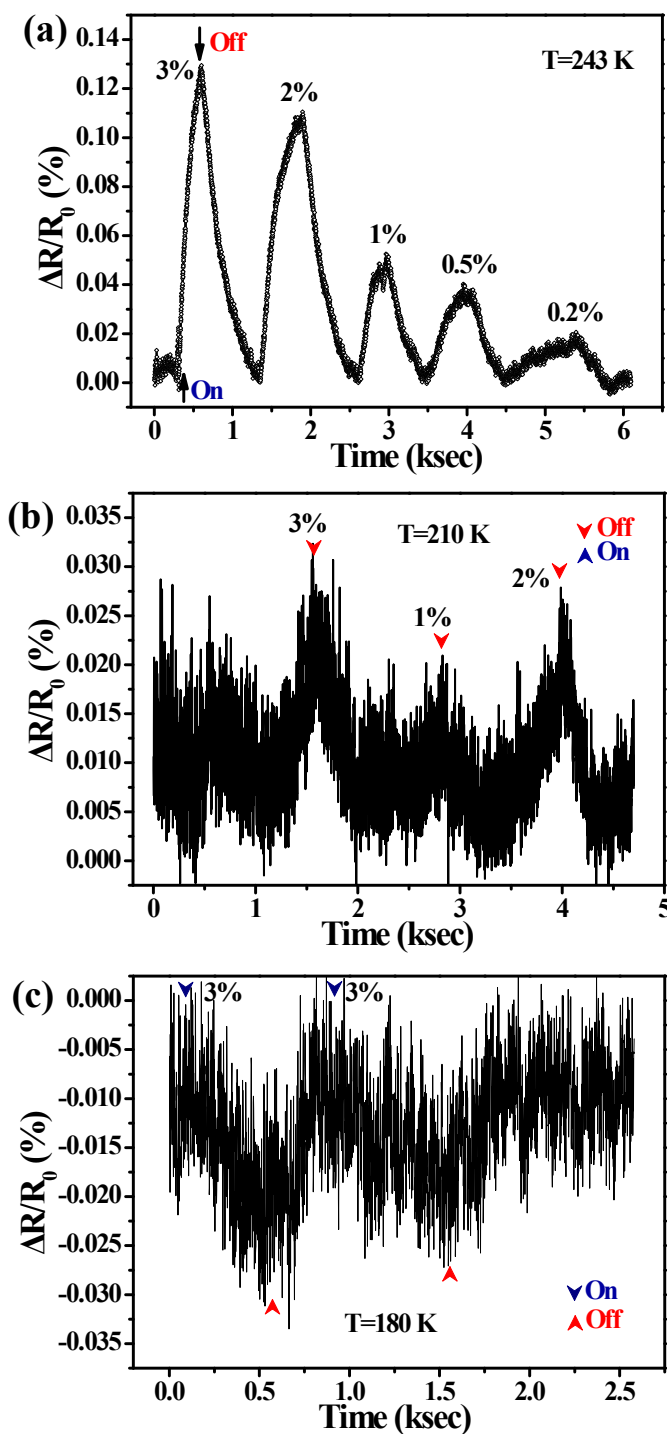

**Figure S6.** The hydrogen-sensing response of Pd<sub>82</sub>Co<sub>18</sub> NWs sensor at (a) 243 K, (b) 210 K and (c) 180, respectively.

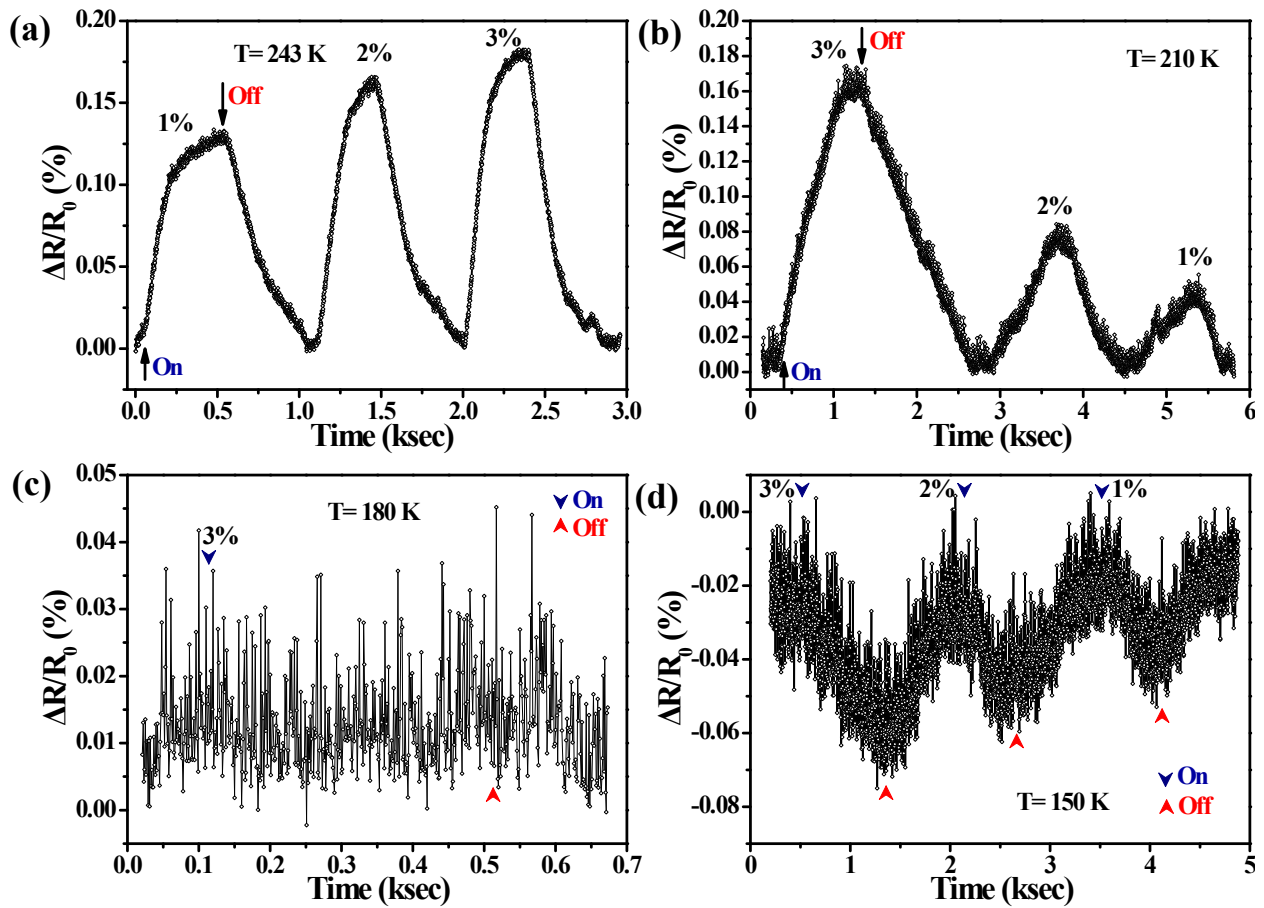

**Figure S7.** The hydrogen-sensing response of  $\text{Pd}_{63}\text{Co}_{37}$  NWs sensor at (a) 143 K, (b) 210 K, (c) 180 K and (d) 150 K, respectively.

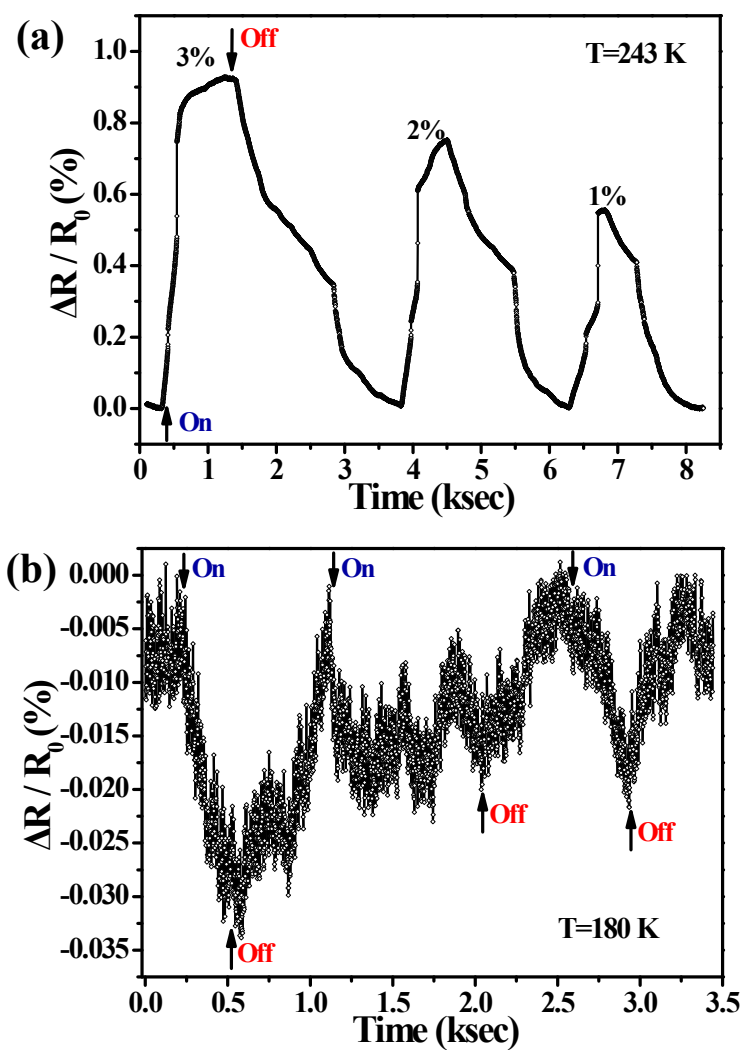

**Figure S8.** The hydrogen-sensing response of  $\text{Pd}_{33}\text{Co}_{67}$  NWs sensor at (a) 243 K, (b) 180 K, respectively.

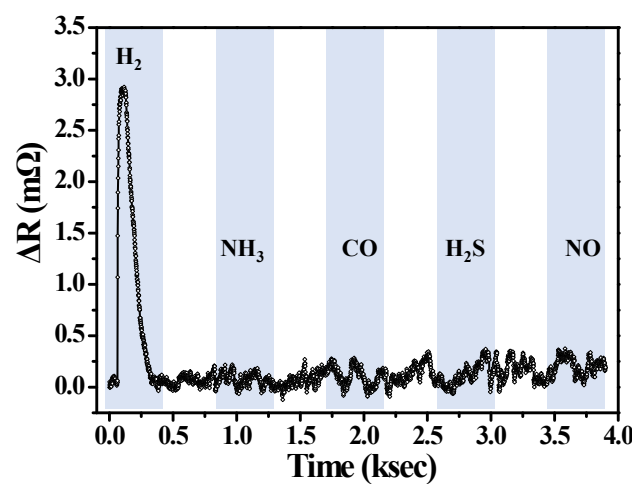

**Figure S9.** The selective response of Pd<sub>63</sub>Co<sub>37</sub> NWs sensors toward 2% H<sub>2</sub> and interfering gases, including 2% NH<sub>3</sub>, CO, H<sub>2</sub>S and 0.5% NO at room temperature.

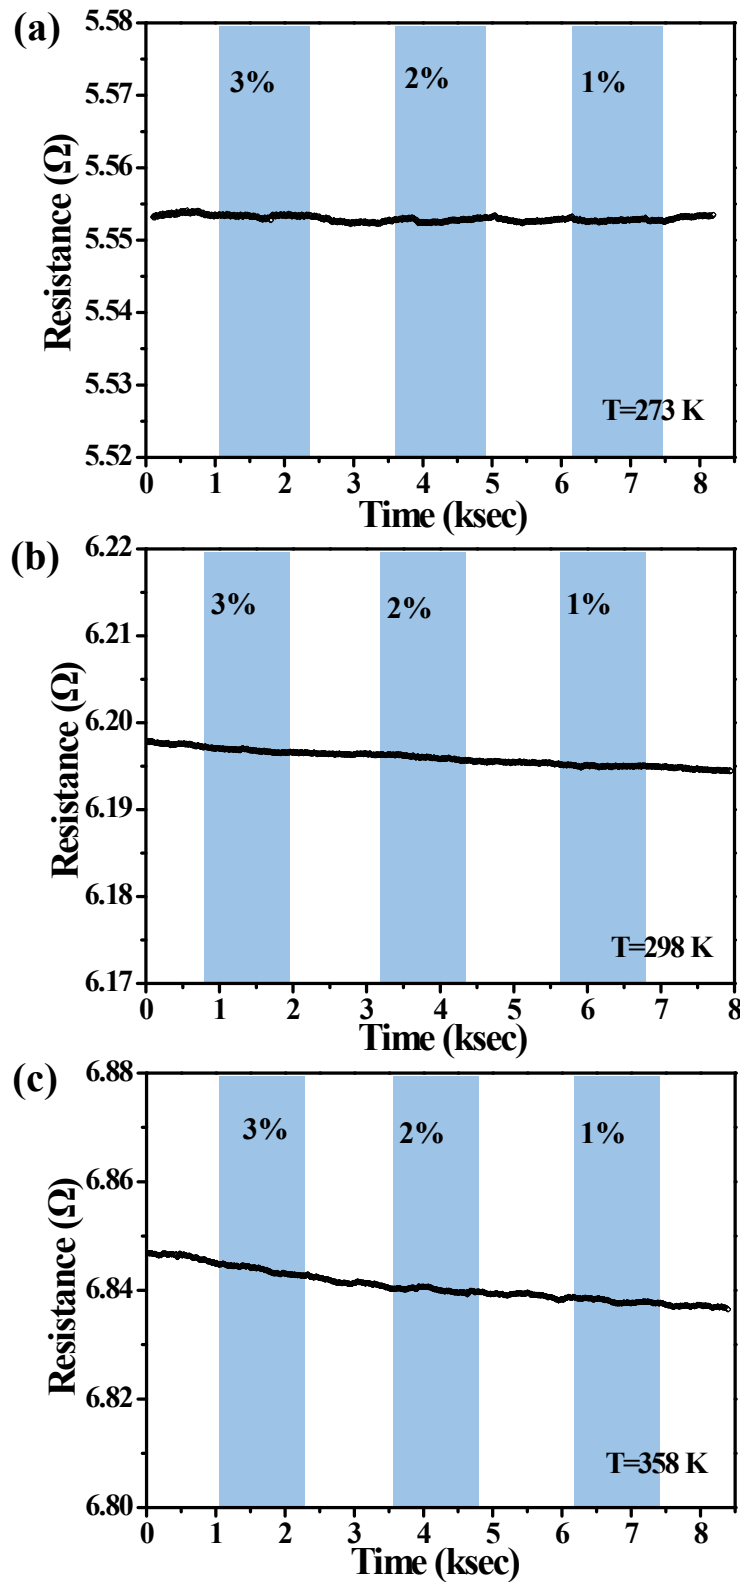

**Figure S10.** The hydrogen-sensing performance of pure Co NWs sensor at (a) 273 K, (b) 298 K, (c) 358 K, respectively.



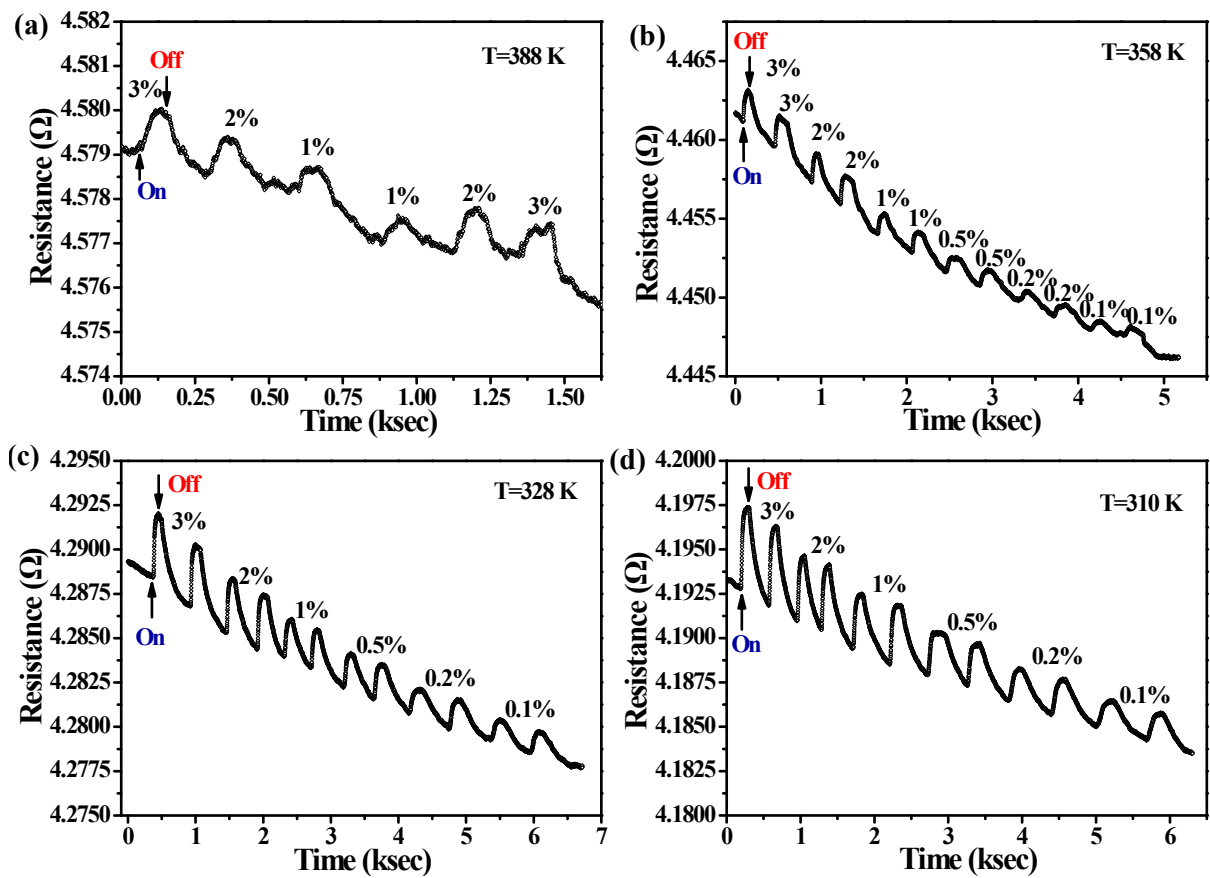

**Figure S11-1.** The transient response curves of the Pd<sub>82</sub>Co<sub>18</sub> NWs sensor towards various H<sub>2</sub> concentrations at (a) 388 K, (b) 358 K, (c) 328 K and (d) 310 K, respectively.

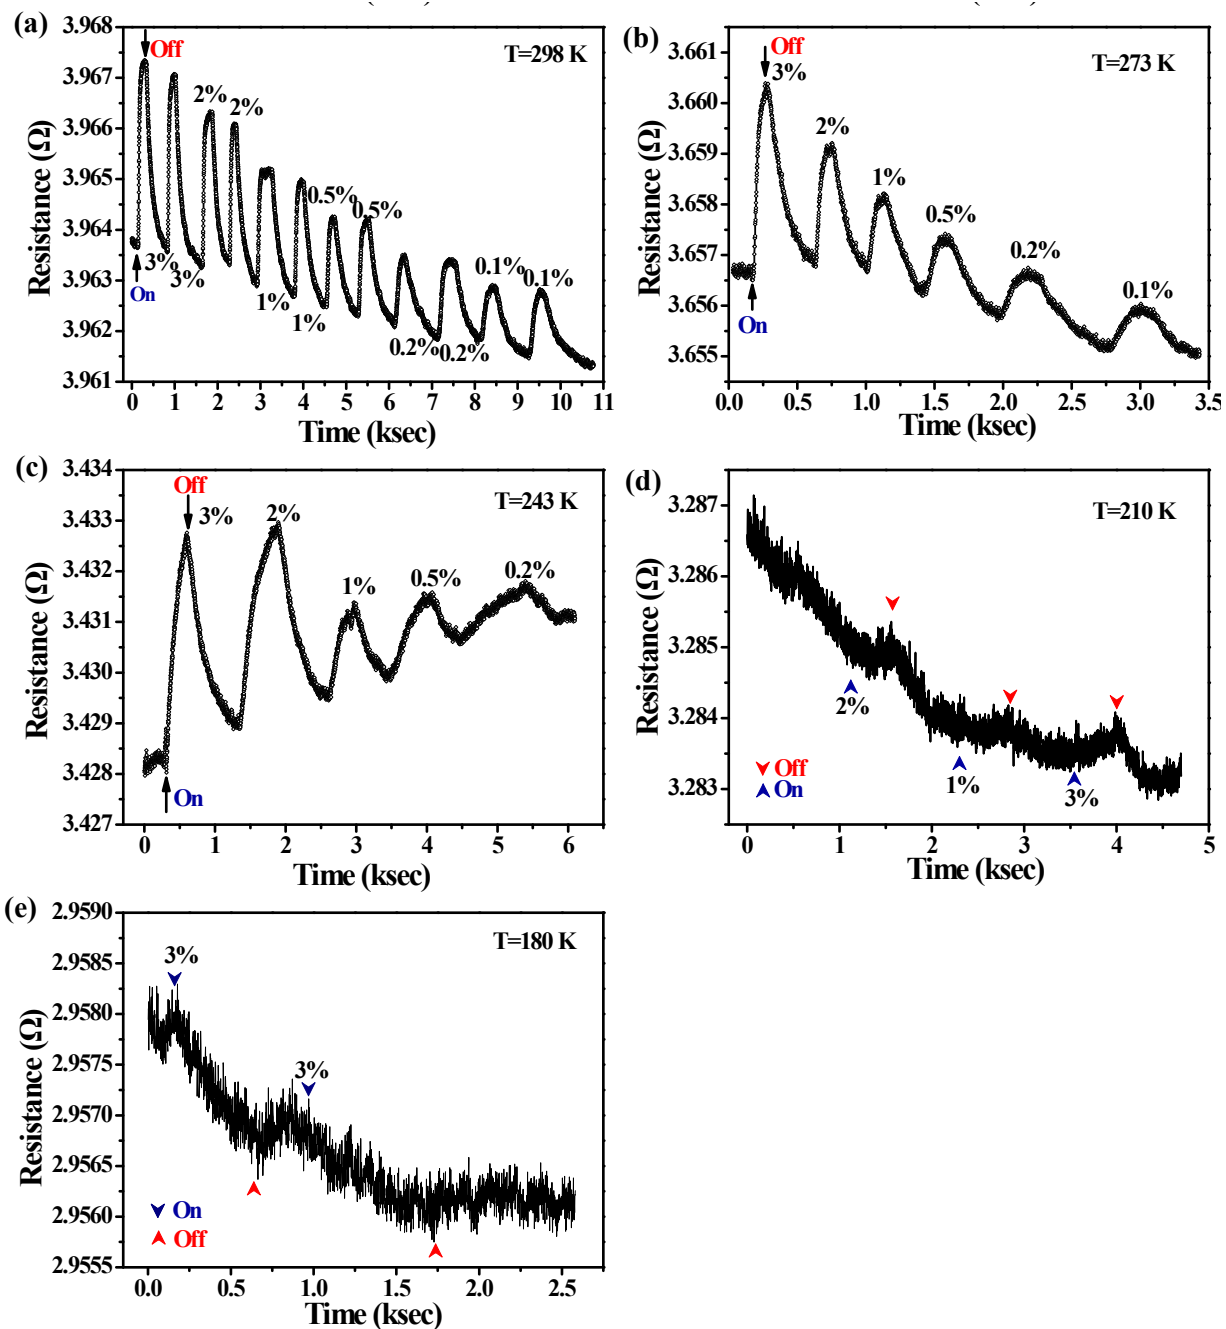

**S11-2.** The transient response curves of the  $\text{Pd}_{82}\text{Co}_{18}$  NWs sensor towards various  $\text{H}_2$  concentrations at (a) 298 K, (b) 273 K, (c) 243 K, (d) 210 K and (e) 180 K, respectively.

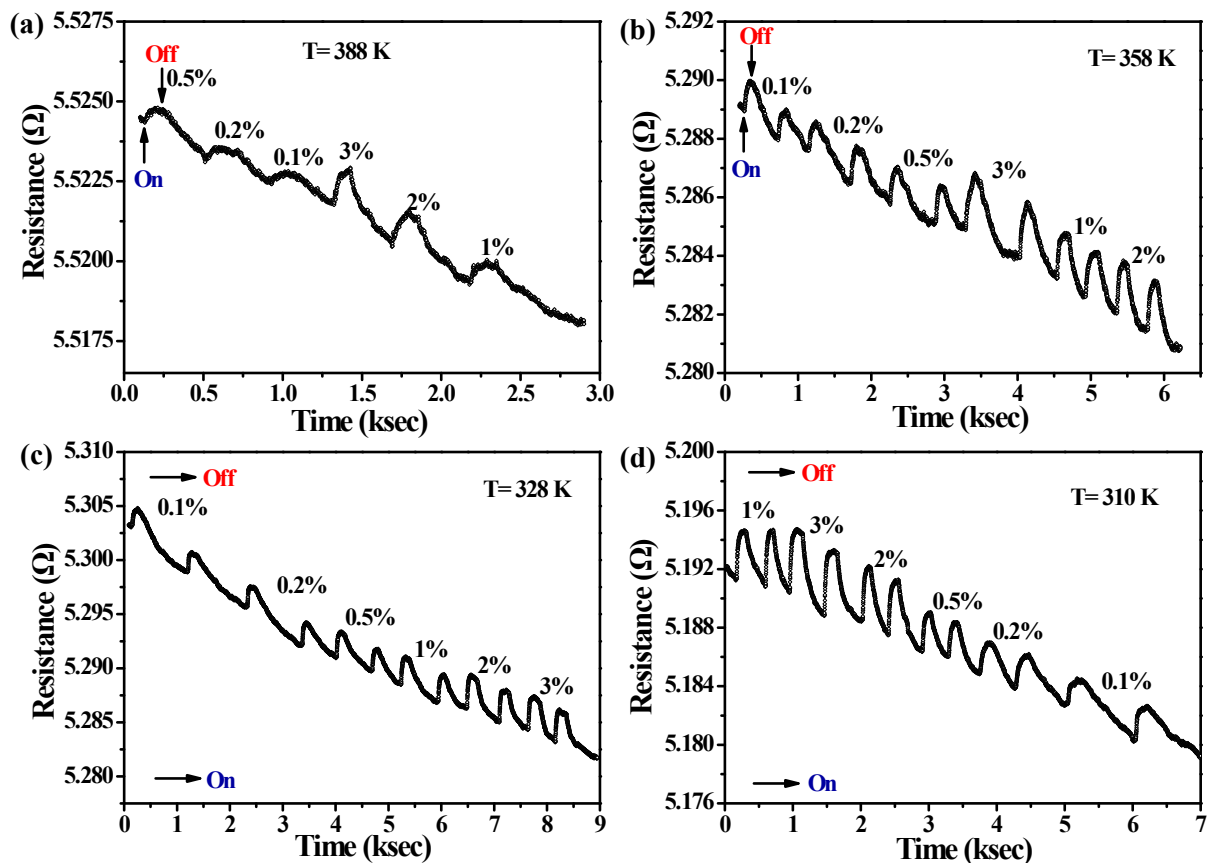

**Figure S12-1.** The transient response curves of the  $\text{Pd}_{63}\text{Co}_{37}$  NWs sensor towards various  $\text{H}_2$  concentrations at (a) 388 K, (b) 358 K, (c) 328 K and (d) 310 K, respectively.

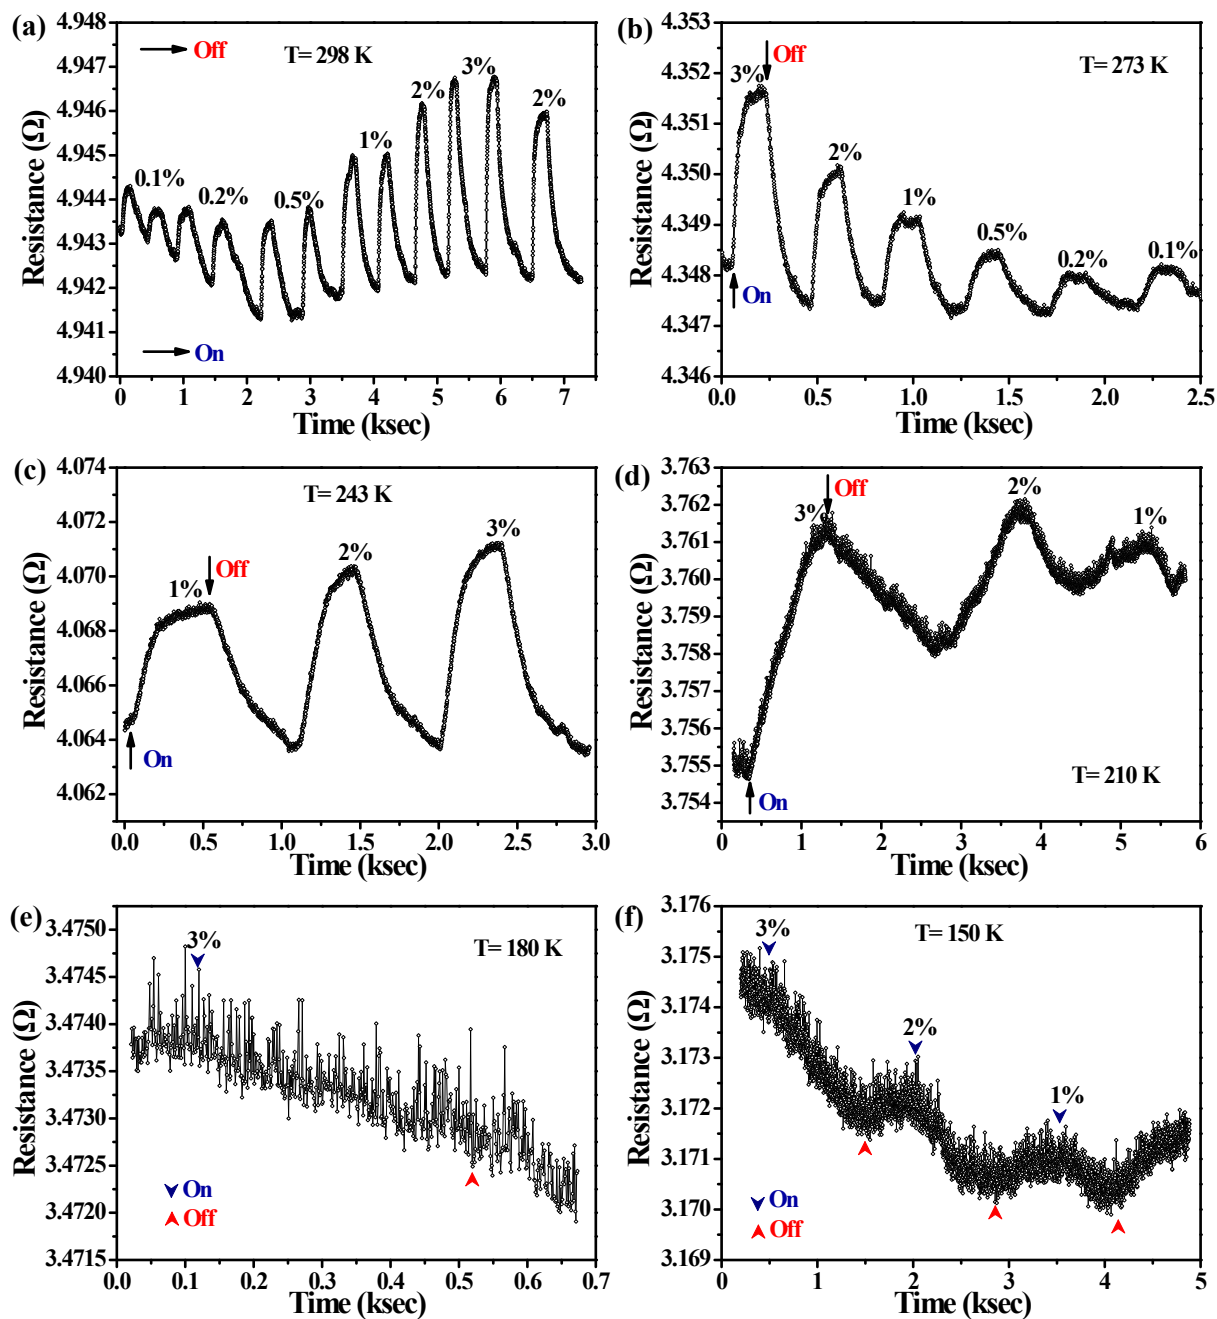

**Figure S12-2.** The transient response curves of the Pd<sub>63</sub>Co<sub>37</sub> NWs sensor towards various H<sub>2</sub> concentrations at (a) 298 K, (b) 273 K, (c) 243 K, (d) 210 K, (e) 180 K and (f) 150 K, respectively.

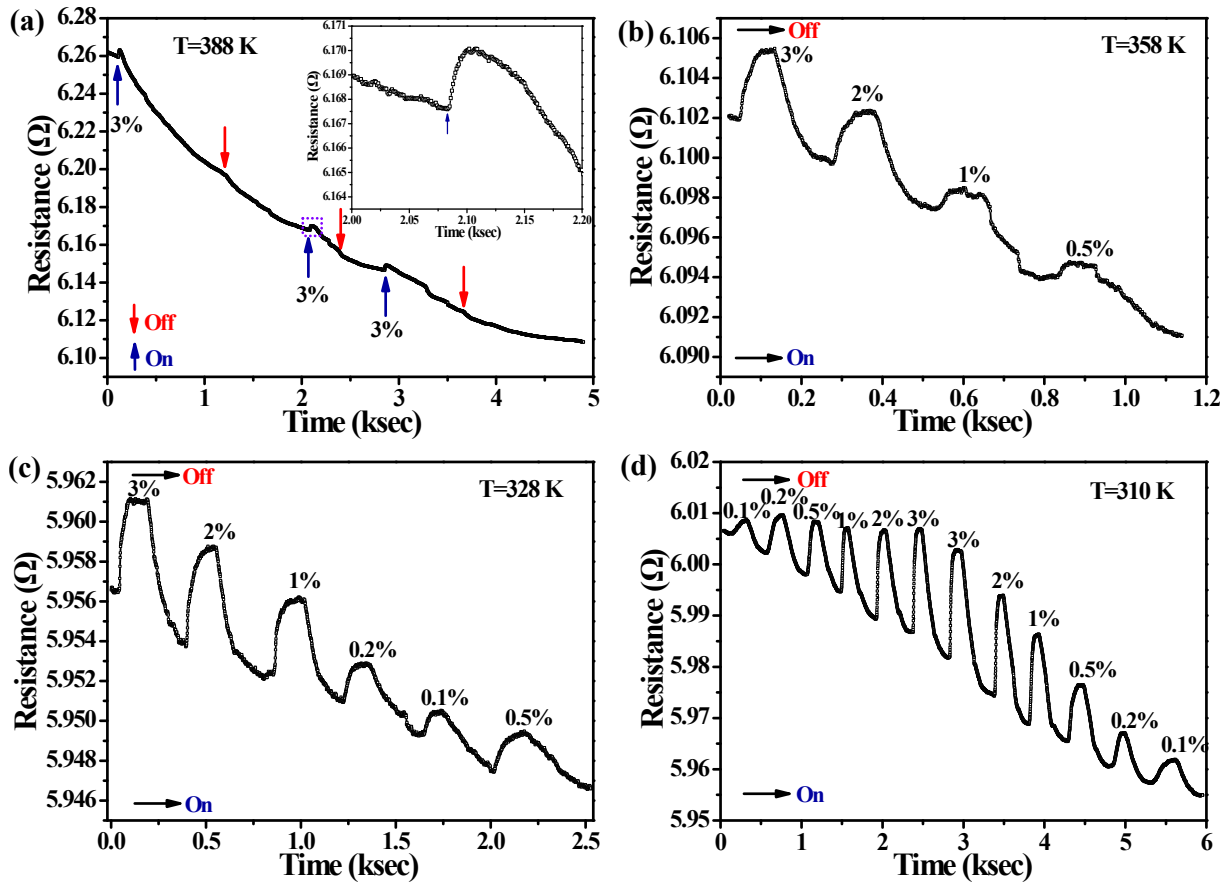

**Figure S13-1.** The transient response curves of the Pd<sub>33</sub>Co<sub>67</sub> NWs sensor towards various H<sub>2</sub> concentrations at (a) 388 K, (b) 358 K, (c) 328 K and (d) 310 K, respectively.

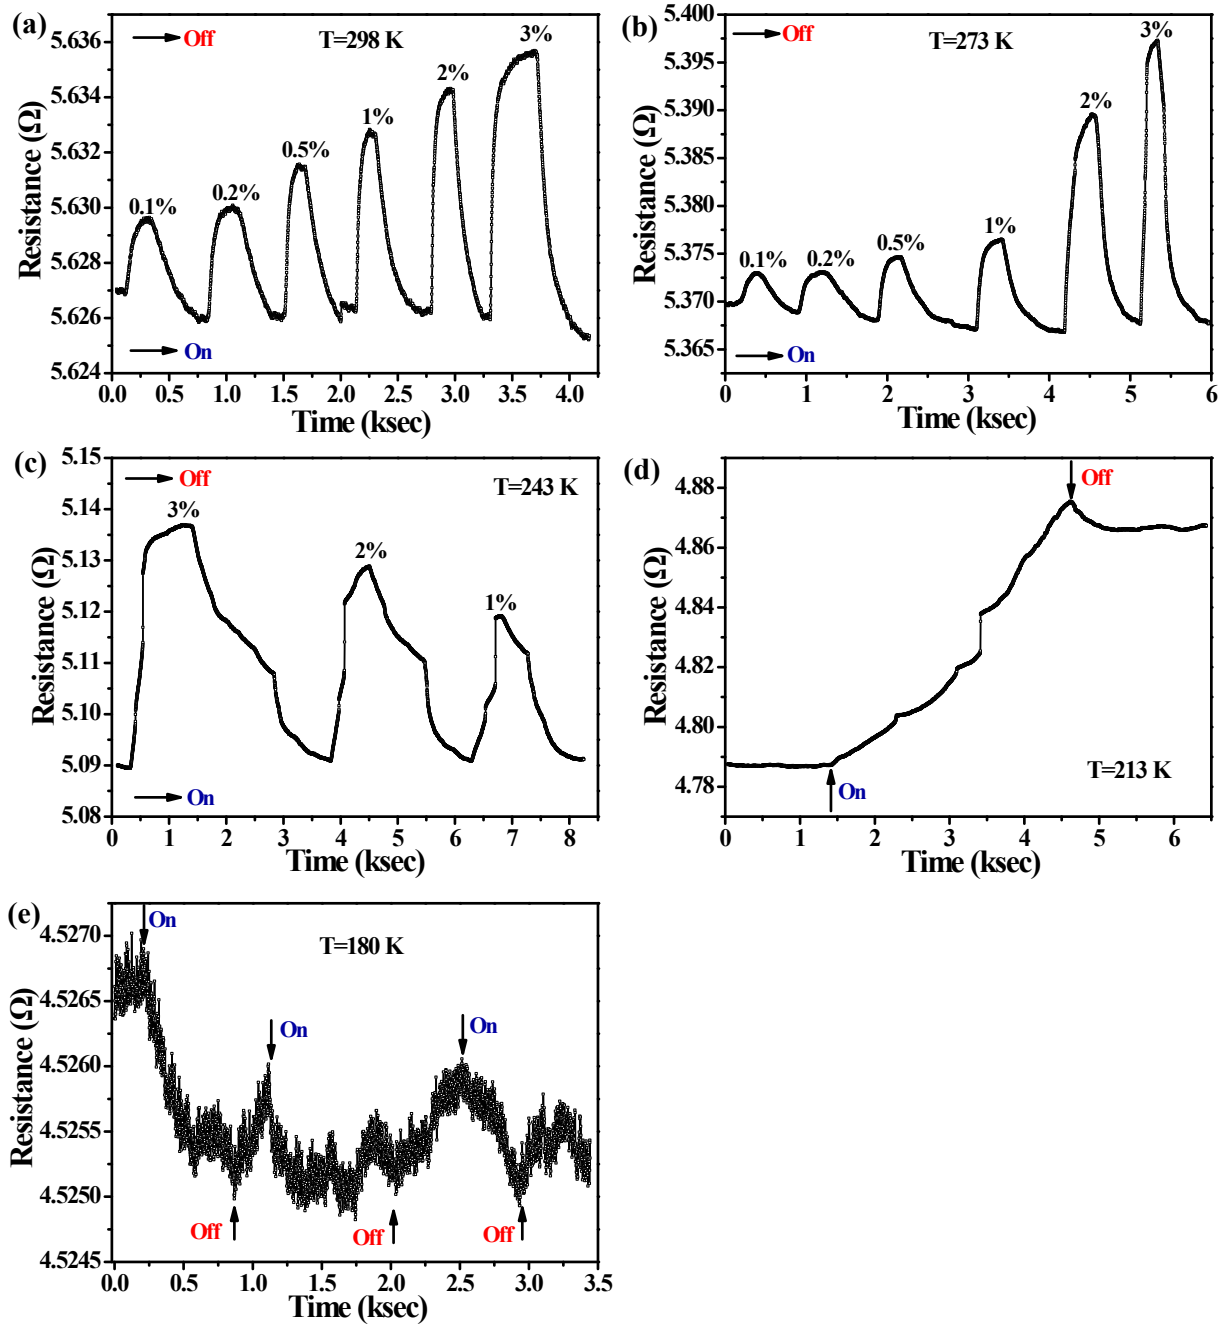

**Figure S13-2.** The transient response curves of the  $\text{Pd}_{33}\text{Co}_{67}$  NWs sensor towards various  $\text{H}_2$  concentrations at (a) 298 K, (b) 273 K, (c) 243 K, (d) 213 K and (e) 180 K, respectively.

## References

- 1 D. Yang and L. F. Fonseca, *Nano lett.*, 2013, **13**, 5642-5646.
- 2 D. Yang, J. Carpena-Nunez, L. F. Fonseca, A. Biaggi-Labiosa and G. W. Hunter, *Sci. Rep.*, 2014, **4**, 3773.
- 3 L. Du, L. Zheng, H. Wei, S. Zheng, Z. Zhu, J. Chen and D. Yang, *ACS Appl. Nano Mater.*, 2019, **2**, 1178-1184.
- 4 D. Yang, G. Meng, C. Zhu and X. Zhu, *Chem. Commun.*, 2009, 7110-7112.
